# Supplementary material for: Identification and Analysis of Natural Building Blocks for Evolution-Guided Fragment-Based Protein Design
Source: PubMed Central journal article supplement — J Mol Biol. 2020 Jun 12;432(13):3898–914. doi: 10.1016/j.jmb.2020.04.013 (PMC7322520; doi:10.1016/j.jmb.2020.04.013), 2020-06-12
Supplement: mmc1.pdf [file mmc1.pdf]

## *Supporting Information for:*

# **Identification and Analysis of Natural Building Blocks for Evolution-Guided Fragment-Based Protein Design**

## **TABLE OF CONTENTS**

### **TEXT**

**Text S1:** Overlapping function.

### **FIGURES**

**Figure S1:** Protein similarity networks using different cutoffs

**Figure S2:** Log-log distribution of domains vs degree of connectivity

**Figure S3:** Network built from 1,000 randomly chosen domains from each of the main four classes

**Figure S4:** Number of components and vertices in the major component using an overlap function (Text S1)

**Figure S5:** Fragments between the all- $\alpha$  and  $\alpha/\beta$  classes in the major component (fragment 0)

**Figure S6:** Fragment universe as shown on the Fuzzle website

### **TABLES**

**Table S1:** 10 most connected hubs in the network ordered by decreasing degree

**Table S2:** 10 most promiscuous component in the network ordered by decreasing number of fold neighbors.

**Table S3:** Connections between domains from the all- $\alpha$  and  $\alpha/\beta$  classes in the major component shown by folds

**Table S3:** Top 20 most popular fold pairs in the major component.

### **REFERENCE**

# TEXT

## Text S1: Overlapping function

We clustered the FUZZLE database using a density-based clustering method. To check if our network topology is a consequence of this clustering we defined an overlapping function. The function is defined as follows: Let D1 and D2 be two domains define a hit A.  $D1_A$  and  $D2_A$  are the two fragments that define the sequence and structural alignment. Thus,  $D1_A$  and  $D2_A$  are a unique sub-domain sized fragment present in domains from different folds, that besides being evolutionary related superimpose spatially. Now, let another alignment B between D1 and D3 match subsections  $D1_B$  and  $D3_B$ . If the residues in fragment  $D1_B$  are virtually the same ones as those in  $D1_A$ , then  $D1_B$ ,  $D3_B$ ,  $D1_A$  and  $D2_A$  are alternative names for the same fragment. There are 208944 that surpass the cutoffs for the construction of the network (see main text). Instead of clustering the domains in these hits by a density method we iteratively computed the overlap among fragments of the same domain with the following formula:

$$\frac{\max(e_A, e_B) - \min(s_A, s_B)}{\min(l_A, l_B)} < 1.11$$

Where  $e_A$ ,  $e_B$ ,  $s_A$ , and  $s_B$  constitute the alignment's ends and starts of domain D1 in the alignment A and B, respectively, and  $l_A$ ,  $l_B$  define the alignment lengths. If  $D1_B$  and  $D1_A$  overlap at least an x % in position and size, a single node can define this domain, otherwise two nodes will be defined. We constructed networks at several overlap cutoffs (ranging from 1 to 1.5). The number of nodes and connected components is represented in **Fig. S4**.

## FIGURES

**Figure S1: Protein similarity networks using different cutoffs: TMscore (a), RMSD (b), and sequence/structural length ratio ( $S_{Aln}/S_{Str}$ ) (c) cutoffs. Probability and structural alignment length were kept as in the main manuscript (probability over 70 % and length between 10 and 200 amino acids). For each parameter, the plot indicates the number of fragments (blue axis) and nodes in the major component (red axis) as a function of the parameter. Two networks are shown for every parameter (denoted as 1 and 2), one with a looser stringent cutoff, and another with more stringent cutoff than the one in the main manuscript, depicted with a green line.**

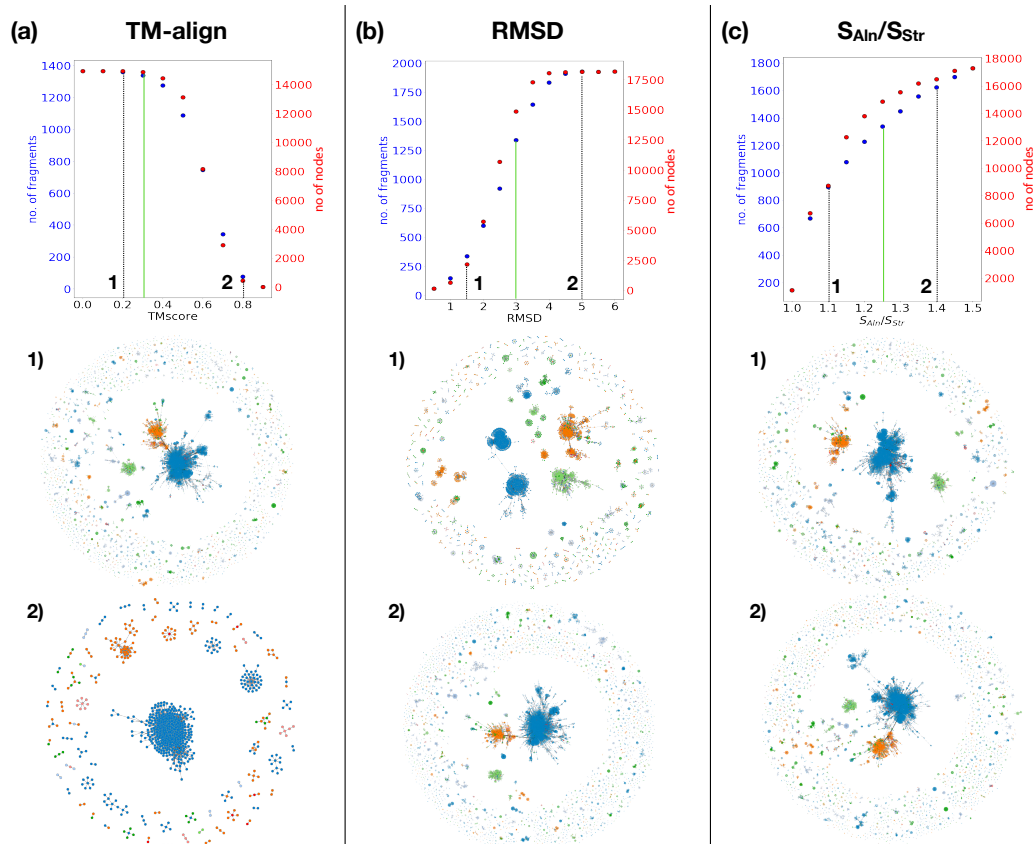

**Figure S2: Log-log distribution of domains vs degree of connectivity.** The y-axis represents the number of domains/nodes that present a certain degree of connectivity (x-axis).

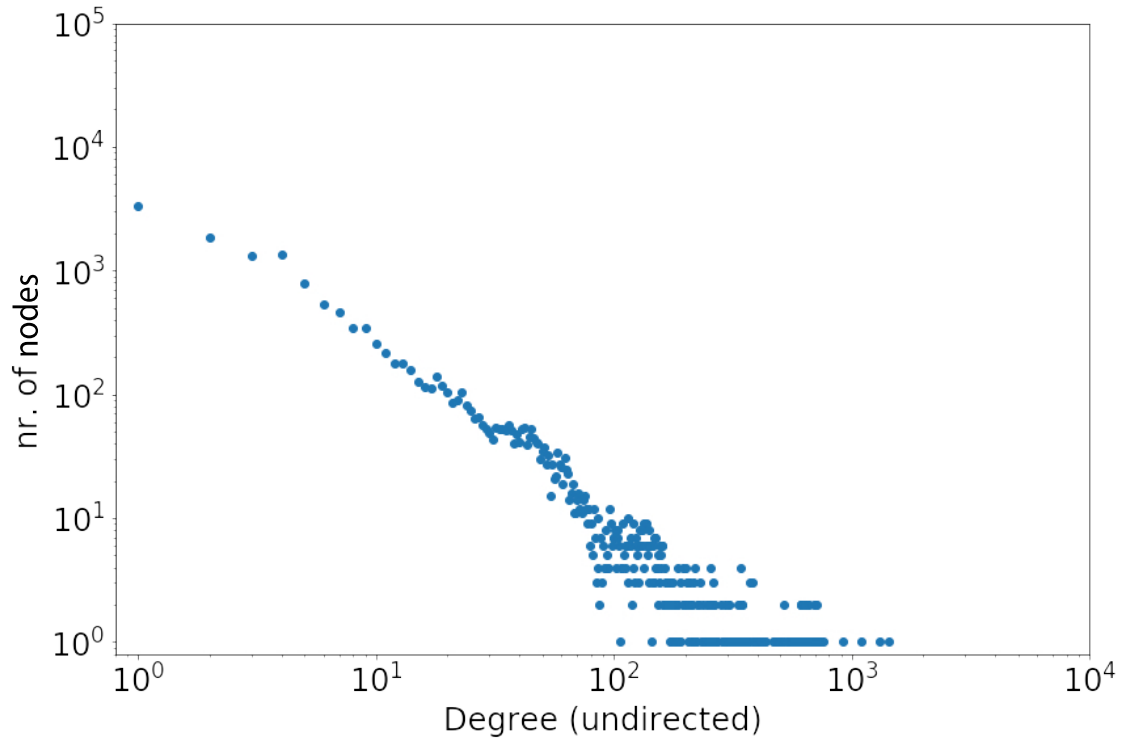

**Figure S3: Network built from 1,000 randomly chosen domains from each of the main four classes.** We took 4,000 random Fuzzle hits where query and subject belonged to the main four SCOPE classes as follows: 700 hits where query and subject belong to the same class, and 100 hits where query and subject belong to different classes. For example, for the *a* class, 700 random hits were taken such as query and subject belonged to a class *a* (*a-a*), and another 100 where query and subject belonged to different classes (*a-b*, *a-c*, and *a-d*).

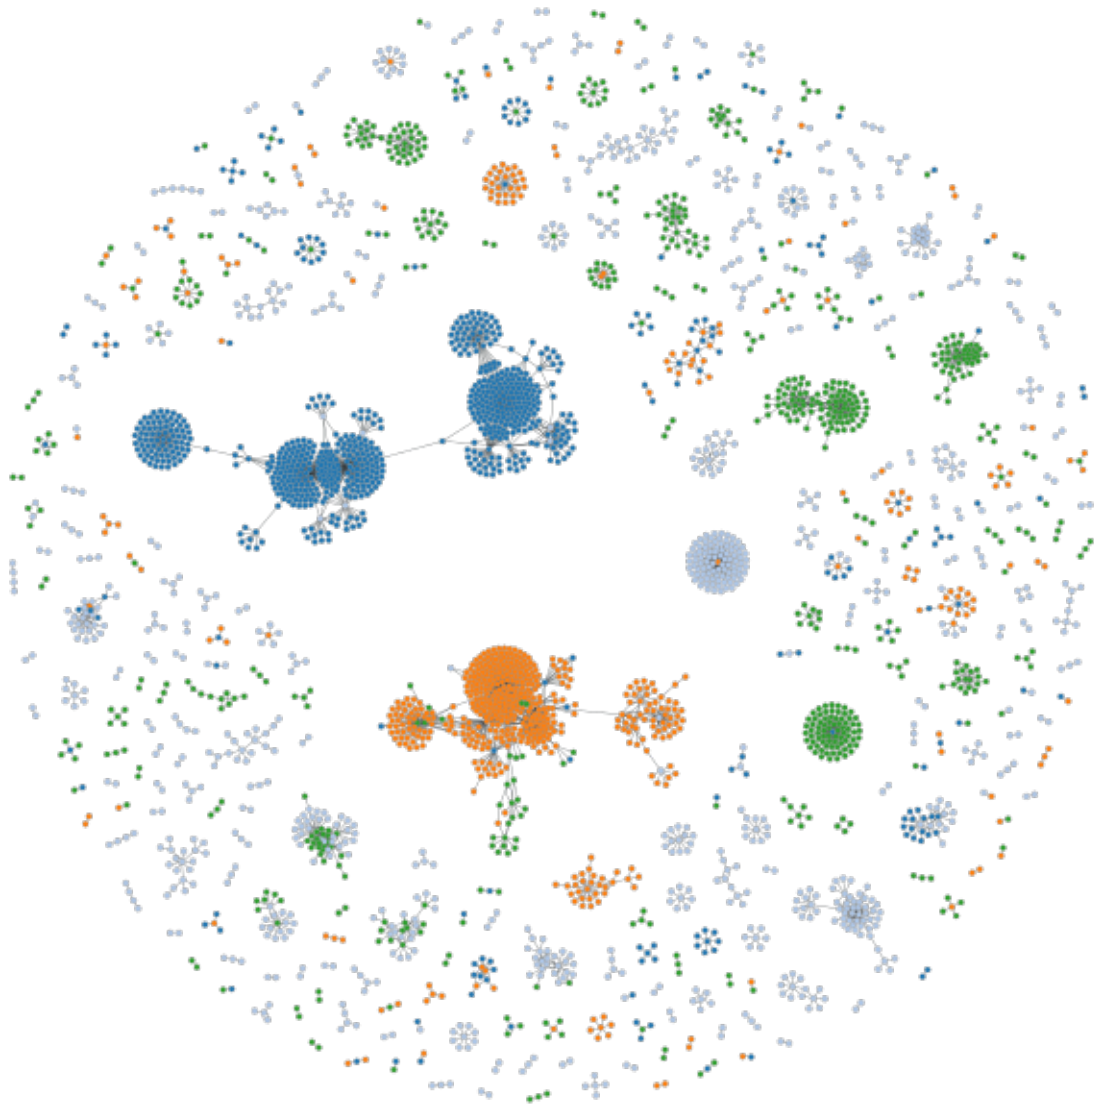

**Figure S4: Number of fragments and nodes in the major component using an overlap function (Text S1).** The rest of the database parameters were kept as in the main manuscript: probability > 70%, structural alignment between 10 and 200 amino acids, RMSD < 3 Å, TM-score > 0.3, and sequence/structural length ratio ( $S_{\text{Aln}}/S_{\text{Str}}$ ) < 1.25 **(a)** Number of fragments and nodes in the major component as a function of the overlap. The overlap that resembles most the results in the manuscript is an overlap of 1.1, which leads to 1,245 fragments and 14,893 nodes in the major component **(c)**. Protein similarity networks for an overlap of 90% **(b)** and 60% **(d)**.

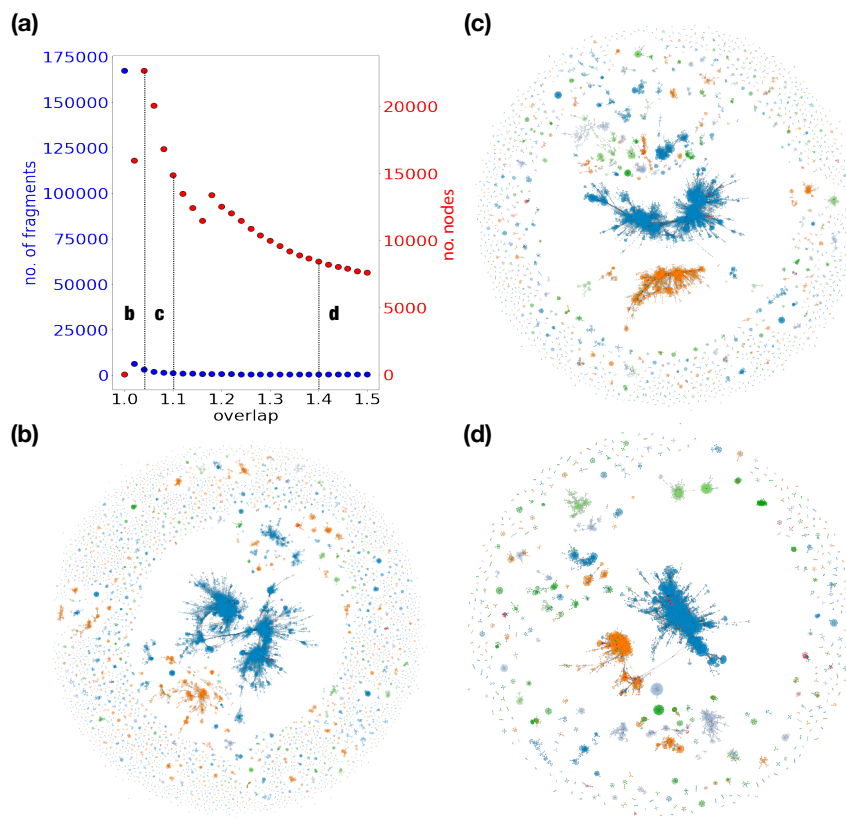

**Figure S5: Fragments between the all- $\alpha$  and  $\alpha/\beta$  classes in the major component (fragment 0).** Superpositions of three fragments that are shared between folds of the all- $\alpha$  (green) and  $\alpha/\beta$  (blue) are shown as cartoons.

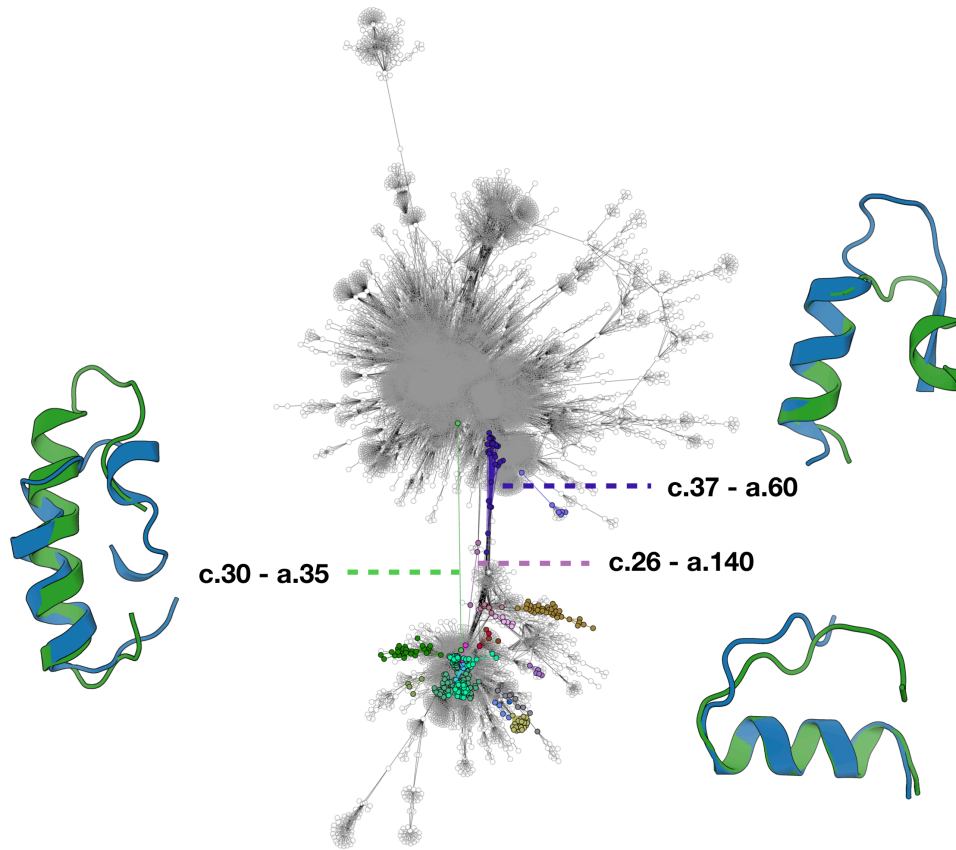

**Figure S6: Fragment universe as shown on the Fuzzle website.** In contrast to Fig. 4 in the manuscript, here nodes initially represent components instead of single domains to enable interactive browsing. Here each node contains several domains that share a common fragment. The individual domains are shown upon clicking on one of the black-circled nodes. In this figure the user clicked on one node indicated by the red arrow, which expands to a grey area. All the white-circled nodes within this area now show the domains contained in this cluster.

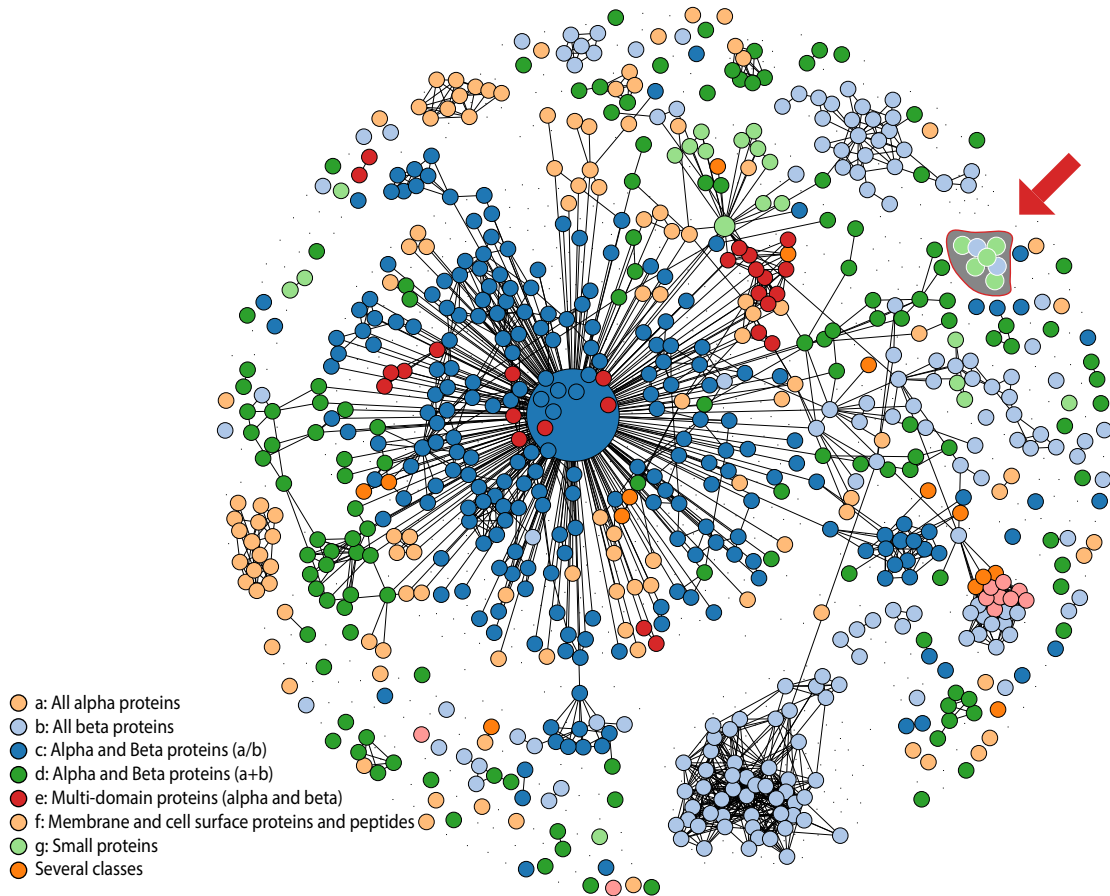



## TABLES

**Table S1: 10 most connected hubs in the network ordered by decreasing degree.**

| <b>Component/<br/>Fragment<br/>No.</b> | <b>Domain</b> | <b>Degree</b> | <b>SCOP<br/>fold</b> | <b>Different<br/>folds among<br/>neighbors</b> |
|----------------------------------------|---------------|---------------|----------------------|------------------------------------------------|
| 182                                    | d1j6ua1       | 1,423         | c.5                  | 25                                             |
| 184                                    | d1p3da1       | 1,317         | c.5                  | 26                                             |
| 183                                    | d4hv4a1       | 1,096         | c.5                  | 20                                             |
| 196                                    | d2x5oa1       | 921           | c.5                  | 20                                             |
| 626                                    | d1ebda2       | 756           | c.3                  | 12                                             |
| 639                                    | d1v59a2       | 738           | c.3                  | 8                                              |
| 558                                    | d1jw9b        | 731           | c.111                | 8                                              |
| 657                                    | d1c0pa1       | 712           | c.4                  | 8                                              |
| 678                                    | d2bi7a1       | 712           | c.4                  | 9                                              |

**Table S2: 10 most promiscuous component in the network ordered by decreasing number of fold neighbors.**

| <b>Component/<br/>Fragment<br/>No.</b> | <b>Domain</b> | <b>Degree</b> | <b>SCOP<br/>fold</b> | <b>Different<br/>folds<br/>among<br/>neighbors</b> |
|----------------------------------------|---------------|---------------|----------------------|----------------------------------------------------|
| 184                                    | d1p3da1       | 1,317         | c.5                  | 26                                                 |
| 182                                    | d1j6ua1       | 1,423         | c.5                  | 25                                                 |
| 183                                    | d4hv4a1       | 1,096         | c.5                  | 20                                                 |
| 196                                    | d2x5oa1       | 921           | c.5                  | 20                                                 |
| 1096                                   | d2x5oa1       | 367           | c.5                  | 20                                                 |
| 623                                    | d1a9xa4       | 552           | c.30                 | 18                                                 |
| 1042                                   | d1b0nb_       | 106           | a.34                 | 18                                                 |
| 722                                    | d1seza1       | 667           | c.3                  | 17                                                 |
| 2750                                   | d1lssa_       | 214           | c.2                  | 17                                                 |

**Table S3: Connections between domains from the all- $\alpha$  and  $\alpha/\beta$  classes in the major component shown by folds.** Connections that are shown in Fig. S5 are highlighted in gray.

| <b>Fold pair</b> | <b>Number of links</b> |
|------------------|------------------------|
| c.23 - a.4       | 155                    |
| c.47 - a.4       | 69                     |
| c.66 - a.156     | 68                     |
| c.43 - a.43      | 39                     |
| c.37 - a.60      | 35                     |
| c.23 - a.35      | 23                     |
| c.45 - a.5       | 23                     |
| c.55 - a.60      | 8                      |
| c.37 - a.5       | 8                      |
| c.113 - a.60     | 6                      |
| c.47 - a.140     | 5                      |
| c.93 - a.35      | 4                      |
| c.123 - a.60     | 4                      |
| c.1 - a.34       | 3                      |
| c.25 - a.43      | 3                      |
| c.26 - a.140     | 2                      |
| c.15 - a.5       | 2                      |
| c.30 - a.35      | 1                      |
| c.25 - a.5       | 1                      |
| c.37 - a.34      | 1                      |
| c.23 - a.43      | 1                      |
| c.26 - a.34      | 1                      |

**Table S4: Top 20 most popular fold pairs in the major component.**

| <b>Fold pair</b> | <b>Number of links</b> |
|------------------|------------------------|
| c.3 - c.2        | 39,822                 |
| c.66 - c.2       | 21,306                 |
| a.4 - a.35       | 15,059                 |
| c.30 - c.2       | 7,811                  |
| c.91 - c.37      | 5,804                  |
| c.78 - c.2       | 5,596                  |
| c.4 - c.2        | 4,610                  |
| c.5 - c.2        | 3,412                  |
| c.2 - c.111      | 2,787                  |
| c.23 - c.1       | 2,512                  |
| a.6 - a.4        | 2,397                  |
| c.65 - c.2       | 2,177                  |
| c.37 - c.2       | 2,094                  |
| c.93 - c.23      | 1,635                  |
| c.72 - c.2       | 1,074                  |
| c.4 - c.3        | 1,014                  |
| c.79 - c.2       | 903                    |
| c.72 - c.37      | 894                    |
| a.74 - a.4       | 864                    |
| c.30 - c.3       | 802                    |

## REFERENCES

1. Alva V, Söding J, Lupas AN: **A vocabulary of ancient peptides at the origin of folded proteins.** *Elife* 2015, 4.
